# Supplementary material for: Plasma Metabolite Signatures in Male Carriers of Genetic Variants Associated with Non-Alcoholic Fatty Liver Disease
Source: MDPI journal article supplement (doi:10.3390/metabo13020267), 2023-02-13
Supplement: s1 [file s1]

**Supplementary Table S1.** Associations of *PNPLA3* rs738409-G, *TM6SF2* rs58542926-T, *MBOAT7* rs641738-T, *GCKR* rs780094-T, *PPP1R3B* rs4841132-A and *HSD17B13* rs72613567-TA with laboratory parameters, Matsuda ISI and body mass index

|                                   | Participants without NAFLD |           |                | Participants with NAFLD |           |                  |
|-----------------------------------|----------------------------|-----------|----------------|-------------------------|-----------|------------------|
| <b><i>PNPLA3</i> rs738409-G</b>   | <b>Beta</b>                | <b>SE</b> | <b>P value</b> | <b>Beta</b>             | <b>SE</b> | <b>P value</b>   |
| ALT (U/l)                         | -0,007                     | 0,070     | 0,747          | 0,318                   | 0,051     | <b>6,6E-10</b>   |
| LDLC (mmol/l)                     | 0,015                      | 0,107     | 0,487          | 0,013                   | 0,088     | 0,887            |
| HDLC (mmol/l)                     | -0,011                     | 0,118     | 0,611          | 0,024                   | 0,106     | 0,822            |
| TAG (mmol/l)                      | -0,001                     | 0,090     | 0,968          | -0,153                  | 0,056     | 0,006            |
| BMI (kg/m <sup>2</sup> )          | 0,020                      | 0,363     | 0,344          | -0,268                  | 0,220     | 0,222            |
| Matsuda ISI                       | 0,057                      | 0,065     | 0,008          | -0,120                  | 0,053     | 0,023            |
| Adiponectin (ug/ml)               | -0,002                     | 0,064     | 0,939          | 0,073                   | 0,060     | 0,224            |
| hs-CRP (mg/l)                     | 0,046                      | 0,028     | 0,030          | -0,019                  | 0,028     | 0,498            |
| Fasting glucose (mmol/l)          | -0,030                     | 0,294     | 0,158          | 0,214                   | 0,142     | 0,133            |
| 2h glucose (mmol/l)               | -0,038                     | 0,104     | 0,076          | 0,046                   | 0,084     | 0,581            |
| Fasting insulin                   | -0,066                     | 0,068     | <b>0,002</b>   | 0,082                   | 0,044     | 0,061            |
| 2h insulin (mU/l)                 | -0,042                     | 0,039     | 0,051          | 0,061                   | 0,036     | 0,086            |
| Fasting FFA (mmol/l)              | -0,034                     | 0,067     | 0,106          | -0,098                  | 0,070     | 0,161            |
|                                   |                            |           |                |                         |           |                  |
| <b><i>TM6SF2</i> rs58542926-T</b> | <b>Beta</b>                | <b>SE</b> | <b>P value</b> | <b>Beta</b>             | <b>SE</b> | <b>P value</b>   |
| ALT (U/l)                         | -0,002                     | 0,039     | 0,938          | 0,029                   | 0,030     | 0,179            |
| LDLC (mmol/l)                     | -0,030                     | 0,060     | 0,146          | -0,033                  | 0,052     | 0,125            |
| HDLC (mmol/l)                     | -0,008                     | 0,066     | 0,690          | 0,017                   | 0,062     | 0,435            |
| TAG (mmol/l)                      | -0,059                     | 0,050     | 0,005          | -0,078                  | 0,033     | <b>&lt;0.001</b> |
| BMI (kg/m <sup>2</sup> )          | 0,019                      | 0,203     | 0,376          | -0,006                  | 0,129     | 0,792            |
| Matsuda ISI (mg/dl, mU/l)         | 0,004                      | 0,036     | 0,847          | -0,010                  | 0,031     | 0,690            |
| Adiponectin (ug/ml)               | -0,025                     | 0,036     | 0,239          | 0,018                   | 0,035     | 0,415            |
| hs-CRP (mg/l)                     | -0,016                     | 0,016     | 0,438          | -0,007                  | 0,016     | 0,751            |
| Fasting glucose (mmol/l)          | -0,002                     | 0,164     | 0,924          | 0,005                   | 0,080     | 0,827            |
| 2h glucose (mmol/l)               | 0,011                      | 0,058     | 0,597          | -0,024                  | 0,049     | 0,321            |
| Fasting insulin                   | -0,004                     | 0,038     | 0,831          | 0,027                   | 0,025     | 0,213            |
| 2h insulin (mU/l)                 | 0,002                      | 0,022     | 0,914          | 0,004                   | 0,021     | 0,869            |
| Fasting FFA (mmol/l)              | -0,024                     | 0,037     | 0,251          | -0,042                  | 0,041     | 0,052            |
|                                   |                            |           |                |                         |           |                  |
| <b><i>MBOAT7</i> rs641738-T</b>   | <b>Beta</b>                | <b>SE</b> | <b>P value</b> | <b>Beta</b>             | <b>SE</b> | <b>P value</b>   |
| ALT (U/l)                         | -0,0003                    | 0,081     | 0,988          | 0,031                   | 0,060     | 0,124            |
| LDLC (mmol/l)                     | -0,017                     | 0,124     | 0,414          | 0,003                   | 0,103     | 0,873            |
| HDLC (mmol/l)                     | -0,007                     | 0,137     | 0,728          | -0,015                  | 0,123     | 0,444            |
| TAG (mmol/l)                      | -0,005                     | 0,105     | 0,801          | -0,023                  | 0,065     | 0,257            |
| BMI (kg/m <sup>2</sup> )          | 0,013                      | 0,423     | 0,521          | -0,004                  | 0,256     | 0,848            |
| Matsuda ISI (mg/dl, mU/l)         | 0,021                      | 0,075     | 0,318          | -0,019                  | 0,061     | 0,376            |

|                               |             |           |                 |             |           |                 |
|-------------------------------|-------------|-----------|-----------------|-------------|-----------|-----------------|
| Adiponectin (ug/ml)           | 0,046       | 0,074     | 0,030           | -0,051      | 0,070     | 0,010           |
| hs-CRP (mg/l)                 | 0,006       | 0,033     | 0,768           | 0,002       | 0,033     | 0,911           |
| Fasting glucose (mmol/l)      | -0,034      | 0,343     | 0,108           | 0,013       | 0,166     | 0,525           |
| 2-hour glucose (mmol/l)       | 0,019       | 0,122     | 0,361           | 0,005       | 0,097     | 0,814           |
| Fasting insulin               | -0,046      | 0,079     | 0,027           | 0,011       | 0,051     | 0,587           |
| 2-hour insulin (mU/l)         | 0,002       | 0,046     | 0,942           | 0,024       | 0,041     | 0,268           |
| Fasting FFA (mmol/l)          | 0,034       | 0,078     | 0,101           | -0,007      | 0,081     | 0,739           |
|                               |             |           |                 |             |           |                 |
| <b>GCKR rs780094-T</b>        | <b>Beta</b> | <b>SE</b> | <b>P value</b>  | <b>Beta</b> | <b>SE</b> | <b>P value</b>  |
| ALT (U/l)                     | -0,017      | 0,080     | 0,425           | -0,001      | 0,061     | 0,962           |
| LDLC (mmol/l)                 | 0,021       | 0,123     | 0,320           | 0,029       | 0,104     | 0,149           |
| HDLC (mmol/l)                 | 0,004       | 0,135     | 0,835           | -0,051      | 0,125     | 0,010           |
| TAG (mmol/l)                  | 0,066       | 0,103     | <b>0,001</b>    | 0,131       | 0,066     | <b>4,31E-11</b> |
| BMI (kg/m2)                   | 0,008       | 0,416     | 0,689           | -0,038      | 0,260     | 0,060           |
| Matsuda ISI (mg/dl, mU/l)     | 0,039       | 0,074     | 0,065           | 0,053       | 0,063     | 0,014           |
| Adiponectin (ug/ml)           | 0,009       | 0,073     | 0,674           | -0,027      | 0,071     | 0,180           |
| hs-CRP (mg/l)                 | -0,005      | 0,032     | 0,821           | 0,029       | 0,033     | 0,145           |
| Fasting glucose (mmol/l)      | -0,034      | 0,338     | 0,101           | -0,044      | 0,168     | 0,026           |
| 2-hour glucose (mmol/l)       | 0,005       | 0,120     | 0,813           | 0,057       | 0,099     | 0,008           |
| Fasting insulin               | -0,038      | 0,078     | 0,066           | -0,055      | 0,052     | 0,006           |
| 2-hour insulin (mU/l)         | -0,023      | 0,045     | 0,284           | -0,021      | 0,042     | 0,332           |
| Fasting FFA (mmol/l)          | -0,012      | 0,077     | 0,581           | 0,052       | 0,082     | 0,010           |
|                               |             |           |                 |             |           |                 |
| <b>PPP1R3B rs4841132-A</b>    | <b>Beta</b> | <b>SE</b> | <b>P value</b>  | <b>Beta</b> | <b>SE</b> | <b>P value</b>  |
| ALT (U/l)                     | -0,028      | 0,062     | 0,178           | 0,007       | 0,046     | 0,731           |
| LDLC (mmol/l)                 | -0,018      | 0,095     | 0,400           | -0,029      | 0,079     | 0,142           |
| HDLC (mmol/l)                 | -0,085      | 0,105     | <b>4,54E-05</b> | -0,064      | 0,095     | <b>0,001</b>    |
| TAG (mmol/l)                  | 0,059       | 0,080     | 0,005           | 0,013       | 0,050     | 0,520           |
| BMI (kg/m2)                   | -0,022      | 0,323     | 0,297           | -0,016      | 0,197     | 0,428           |
| Matsuda ISI (mg/dl, mU/l)     | -0,011      | 0,058     | 0,611           | 0,000       | 0,047     | 0,993           |
| Adiponectin (ug/ml)           | -0,013      | 0,057     | 0,528           | 0,021       | 0,054     | 0,286           |
| hs-CRP (mg/l)                 | -0,031      | 0,025     | 0,139           | -0,042      | 0,025     | 0,037           |
| Fasting glucose (mmol/l)      | 0,034       | 0,262     | 0,098           | 0,015       | 0,128     | 0,439           |
| 2-hour glucose (mmol/l)       | -0,027      | 0,094     | 0,200           | -0,054      | 0,074     | 0,012           |
| Fasting insulin               | 0,033       | 0,061     | 0,111           | 0,020       | 0,039     | 0,309           |
| 2-hour insulin (mU/l)         | -0,024      | 0,035     | 0,247           | -0,042      | 0,032     | 0,051           |
| Fasting FFA (mmol/l)          | -0,083      | 0,060     | <b>7,10E-05</b> | -0,078      | 0,062     | <b>9,74E-05</b> |
|                               |             |           |                 |             |           |                 |
| <b>HSD17B13 rs72613567:TA</b> | <b>Beta</b> | <b>SE</b> | <b>P value</b>  | <b>Beta</b> | <b>SE</b> | <b>P value</b>  |
| ALT (U/l)                     | -0,027      | 0,067     | 0,192           | -0,074      | 0,050     | <b>2,22E-04</b> |
| LDLC (mmol/l)                 | 0,004       | 0,102     | 0,864           | 0,012       | 0,086     | 0,537           |

|                           |        |       |       |        |       |              |
|---------------------------|--------|-------|-------|--------|-------|--------------|
| HDLC (mmol/l)             | -0,012 | 0,113 | 0,566 | -0,008 | 0,103 | 0,685        |
| TAG (mmol/l)              | 0,023  | 0,086 | 0,282 | 0,066  | 0,055 | <b>0,001</b> |
| BMI (kg/m <sup>2</sup> )  | 0,014  | 0,348 | 0,502 | -0,027 | 0,215 | 0,182        |
| Matsuda ISI (mg/dl, mU/l) | -0,022 | 0,062 | 0,296 | 0,006  | 0,052 | 0,794        |
| Adiponectin (ug/ml)       | -0,012 | 0,061 | 0,559 | -0,010 | 0,058 | 0,614        |
| hs-CRP (mg/l)             | 0,025  | 0,027 | 0,232 | -0,010 | 0,027 | 0,613        |
| Fasting glucose (mmol/l)  | -0,008 | 0,282 | 0,702 | -0,021 | 0,139 | 0,292        |
| 2-hour glucose (mmol/l)   | 0,014  | 0,100 | 0,511 | -0,024 | 0,082 | 0,267        |
| Fasting insulin           | 0,015  | 0,065 | 0,482 | -0,016 | 0,043 | 0,429        |
| 2-hour insulin (mU/l)     | 0,012  | 0,038 | 0,561 | -0,013 | 0,035 | 0,566        |
| Fasting FFA (mmol/l)      | 0,015  | 0,064 | 0,479 | -0,018 | 0,068 | 0,377        |

---

Abbreviations: ALT, alanine aminotransferase; LDLC, low density lipoprotein cholesterol; HDLC, high density lipoprotein cholesterol; TAG, triacylglycerol; BMI, body mass index; hs-CRP, high sensitivity C-reactive protein; FFA, free fatty acids. Results obtained using linear regression. P-values <0,0025 are statistically significant (14 variables+6 genetic variants). Statistically significant results are marked in bold.

**Supplementary Table S2.** Associations of *PNPLA3* rs738409-G, *TM6SF2* rs58542926-T, *GCKR* rs780094-T, *PPP1R3B* rs4841132-A and *HSD17B13* rs72613567:TA with metabolites in participants with NAFLD

| <i>PNPLA3</i> rs738409-G                                         | Direct parent         | Beta   | SE    | P-value  | Novel |
|------------------------------------------------------------------|-----------------------|--------|-------|----------|-------|
| <b>Organic acids</b>                                             |                       |        |       |          |       |
| 3-ureidopropionate                                               | Urea                  | 0,136  | 0,037 | 1,85E-10 | Yes   |
| <b>Amino acids</b>                                               |                       |        |       |          |       |
| Serine                                                           | -                     | 0,095  | 0,035 | 3,92E-06 | Yes   |
| N-acetylmethionine                                               | Methionine derivative | -0,092 | 0,042 | 6,66E-06 | No    |
| N-acetylisoputrescine                                            | γ-amino acid          | 0,107  | 0,036 | 1,70E-07 | Yes   |
| <b>Lipids</b>                                                    |                       |        |       |          |       |
| <b>Sphingolipids</b>                                             |                       |        |       |          |       |
| Lactosyl-N-nervonoyl-sphingosine (d18:1/24:1)                    | Lactosyl ceramide     | 0,109  | 0,040 | 1,20E-06 | Yes   |
| Ceramide (d16:1/24:1; d18:1/22:1)                                | Ceramide              | -0,099 | 0,037 | 1,70E-05 | Yes   |
| <b>Fatty acids</b>                                               |                       |        |       |          |       |
| 12-13DiHOME                                                      | Long chain fatty acid | 0,114  | 0,040 | 2,95E-06 | Yes   |
| <b>Bile acids</b>                                                |                       |        |       |          |       |
| Taurochenodeoxycholate                                           | -                     | 0,100  | 0,036 | 1,54E-06 | Yes   |
| Glycochenodeoxycholate                                           | -                     | 0,093  | 0,035 | 5,98E-06 | Yes   |
| <b>Other metabolites</b>                                         |                       |        |       |          |       |
| Retinol (Vitamin A)                                              | Vitamin               | -0,090 | 0,037 | 1,27E-05 | No    |
| Glutamine conjugate of C6H10O21                                  | -                     | 0,090  | 0,032 | 1,40E-05 | Yes   |
| Branched-chain/straight-chain or cyclopropyl 10:1 fatty acid [1] | -                     | 0,092  | 0,037 | 7,29E-06 | Yes   |
| Aconitate (cis or trans)                                         | Tricarboxylic acids   | 0,085  | 0,035 | 3,27E-05 | Yes   |
| N1/N8 acetylspermidine                                           | Carboxymidic acid     | 0,091  | 0,036 | 9,69E-06 | Yes   |
|                                                                  |                       |        |       |          |       |
| <b>TM6SF2</b>                                                    |                       |        |       |          |       |
| <b>Lipids</b>                                                    |                       |        |       |          |       |
| <b>Glycerolipids</b>                                             |                       |        |       |          |       |

|                                                |                |                |           |              |     |
|------------------------------------------------|----------------|----------------|-----------|--------------|-----|
| Palmitoleoyl-linoleoyl-glycerol (16:1/18:2)[1] | Diacylglycerol | -<br>0,10<br>4 | 0,07<br>0 | 8,58E-<br>06 | Yes |
| Oleoyl-linoleoyl-glycerol (18:1/18:2) [1]      | Diacylglycerol | -<br>0,08<br>7 | 0,06<br>4 | 2,63E-<br>05 | Yes |
| Oleoyl-linoleoyl-glycerol (18:1/18:2 [2]       | Diacylglycerol | -<br>0,08<br>5 | 0,06<br>4 | 4,05E-<br>05 | Yes |
| <b>Glycerophospholipids</b>                    |                |                |           |              |     |
| 1-myristoyl-2-docosaheptaenoyl-GPC (14:0/22:6) | PC             | -<br>0,09<br>1 | 0,06<br>1 | 1,11E-<br>05 | Yes |
| 1-myristoyl-2-arachidonoyl-GPC (14:0/20:4)     | PC             | -<br>0,08<br>6 | 0,06<br>1 | 2,89E-<br>05 | Yes |
|                                                |                |                |           |              |     |
| <b>MBOAT7</b>                                  |                |                |           |              |     |
| <b>Lipids</b>                                  |                |                |           |              |     |
| <b>Glycerophospholipids</b>                    |                |                |           |              |     |
| 1-palmitoyl-2-linoleoyl-GPI (16:0/18:2)*       | PI             | 0,20<br>4      | 0,03<br>1 | 0,00E+<br>00 | Yes |
| 1-stearoyl-2-arachidonoyl-GPI (18:0/20:4)*     | PI             | -<br>0,20<br>6 | 0,03<br>1 | 0,00E+<br>00 | Yes |
| 1-stearoyl-2-linoleoyl-GPI (18:0/18:2)*        | PI             | 0,21<br>1      | 0,03<br>0 | 0,00E+<br>00 | Yes |
| 1-palmitoyl-2-oleoyl-GPI (16:0/18:1)*          | PI             | 0,18<br>4      | 0,03<br>0 | 0,00E+<br>00 | Yes |
| 1-palmitoyl-2-arachidonoyl-GPI (16:0/20:4)*    | PI             | -<br>0,13<br>7 | 0,02<br>9 | 3,92E-<br>11 | Yes |
| 1-stearoyl-2-oleoyl-GPI (18:0/18:1)*           | PI             | 0,11<br>8      | 0,03<br>4 | 1,62E-<br>07 | Yes |
| 1-linoleoyl-GPI (18:2)*                        | Lyso-PI        | 0,19<br>9      | 0,03<br>0 | 0,00E+<br>00 | Yes |
| 1-arachidonoyl-GPI (20:4)*                     | Lyso-PI        | -<br>0,17<br>4 | 0,03<br>0 | 2,00E-<br>17 | Yes |
| 1-palmitoleoyl-GPI (16:1)*                     | Lyso-PI        | 0,16<br>3      | 0,03<br>1 | 8,02E-<br>14 | Yes |
| 1-oleoyl-GPI (18:1)*                           | Lyso-PI        | 0,12<br>8      | 0,03<br>0 | 3,71E-<br>10 | Yes |
|                                                |                |                |           |              |     |
| <b>GCKR</b>                                    |                |                |           |              |     |
| <b>Carbohydrates</b>                           |                |                |           |              |     |
| Mannose*                                       |                | -<br>0,32<br>9 | 0,02<br>8 | 0,00E+<br>00 | No  |

|                                              |                          |                |           |              |     |
|----------------------------------------------|--------------------------|----------------|-----------|--------------|-----|
| Pyruvate                                     |                          | 0,12<br>8      | 0,02<br>9 | 3,37E-<br>10 | No  |
| Lactate                                      |                          | 0,10<br>0      | 0,02<br>9 | 9,13E-<br>07 | No  |
| <b>Amino acids</b>                           |                          |                |           |              |     |
| threonine                                    | -                        | -<br>0,09<br>3 | 0,02<br>9 | 4,61E-<br>06 | No  |
| isoleucine                                   | -                        | 0,08<br>3      | 0,02<br>9 | 4,41E-<br>05 | Yes |
| 1-carboxyethylleucine                        | Leucine<br>pathway       | 0,13<br>3      | 0,03<br>0 | 2,20E-<br>09 | Yes |
| 1-carboxyethylvaline                         | Valine<br>pathway        | 0,12<br>5      | 0,03<br>0 | 5,66E-<br>09 | Yes |
| 1-carboxyethylisoleucine                     | Isoleucine<br>pathway    | 0,11<br>8      | 0,03<br>2 | 1,66E-<br>07 | Yes |
| gamma-glutamylthreonine                      | γ-glutamyl<br>amino acid | -<br>0,08<br>9 | 0,03<br>1 | 1,26E-<br>05 | Yes |
| gamma-glutamyl-citrulline                    | γ-glutamyl<br>amino acid | -<br>0,08<br>6 | 0,03<br>1 | 2,45E-<br>05 | Yes |
| 3-aminoisobutyrate                           | β-amino acids            | -<br>0,09<br>5 | 0,03<br>1 | 3,25E-<br>06 | No  |
| 4-guanidinobutanoate                         | γ-amino acids            | -<br>0,08<br>8 | 0,03<br>0 | 1,56E-<br>05 | Yes |
| <b>Lipids</b>                                |                          |                |           |              |     |
| <b>Glycerolipids</b>                         |                          |                |           |              |     |
| 1-myristoylglycerol (14:0)                   | Monoacylglyc<br>erol     | 0,10<br>9      | 0,03<br>1 | 1,28E-<br>07 | No  |
| 1-palmitoleoylglycerol (16:1)                | Monoacylglyc<br>erol     | 0,10<br>5      | 0,02<br>9 | 3,71E-<br>07 | No  |
| 1-linolenoylglycerol (18:3)                  | Monoacylglyc<br>erol     | 0,10<br>0      | 0,03<br>1 | 3,24E-<br>06 | Yes |
| Palmitoyl-oleoyl-glycerol (16:0/18:1) [2]    | Diacylglycerol           | 0,15<br>2      | 0,03<br>7 | 3,47E-<br>09 | Yes |
| Palmitoyl-oleoyl-glycerol (16:0/18:1) [1]    | Diacylglycerol           | 0,19<br>3      | 0,04<br>5 | 5,24E-<br>09 | Yes |
| Oleoyl-arachidonoyl-glycerol (18:1/20:4) [1] | Diacylglycerol           | 0,11<br>4      | 0,03<br>0 | 5,89E-<br>08 | No  |
| Oleoyl-linoleoyl-glycerol (18:1/18:2) [2]    | Diacylglycerol           | 0,10<br>9      | 0,03<br>0 | 1,06E-<br>07 | No  |
| Oleoyl-oleoyl-glycerol (18:1/18:1) [1]       | Diacylglycerol           | 0,12<br>3      | 0,03<br>4 | 4,62E-<br>07 | No  |
| Oleoyl-oleoyl-glycerol (18:1/18:1) [2]       | Diacylglycerol           | 0,11<br>8      | 0,03<br>3 | 5,12E-<br>07 | No  |

|                                                    |                |           |           |              |     |
|----------------------------------------------------|----------------|-----------|-----------|--------------|-----|
| Oleoyle-linoleoyl-glycerol (18:1/18:2) [1]         | Diacylglycerol | 0,09<br>8 | 0,03<br>0 | 1,92E-<br>06 | No  |
| Palmitoleoyl-linoleoyl-glycerol (16:1/18:2) [1]    | Diacylglycerol | 0,11<br>0 | 0,03<br>2 | 1,94E-<br>06 | No  |
| Diacylglycerol (16:1/18:2 [2]; 16:0/18:3 [1])      | Diacylglycerol | 0,10<br>1 | 0,03<br>0 | 2,76E-<br>06 | Yes |
| Palmitoyl-linoleoyl-glycerol (16:0/18:2) [2]       | Diacylglycerol | 0,10<br>1 | 0,03<br>1 | 4,85E-<br>06 | No  |
| Oleoyle-arachidonoyl-glycerol (18:1/20:4)[2]       | Diacylglycerol | 0,09<br>2 | 0,03<br>1 | 1,49E-<br>05 | No  |
| Myristoyl-linoleoyl-glycerol (14:0/18:2)[2]        | Diacylglycerol | 0,10<br>0 | 0,03<br>5 | 3,97E-<br>05 | Yes |
| <b>Glycerophospholipids</b>                        |                |           |           |              |     |
| 1-stearoyl-2-oleoyl-GPE (18:0/18:1)                | PE             | 0,10<br>7 | 0,03<br>0 | 1,80E-<br>07 | No  |
| 1-palmitoyl-2-oleoyl-GPE (16:0/18:1)               | PE             | 0,10<br>5 | 0,02<br>9 | 2,54E-<br>07 | No  |
| 1-stearoyl-2-docosahexaenoyl-GPE (18:0/22:6)       | PE             | 0,09<br>2 | 0,02<br>8 | 7,54E-<br>06 | No  |
| 1-stearoyl-2-linoleoyl-GPE (18:0/18:2)             | PE             | 0,08<br>9 | 0,03<br>0 | 1,47E-<br>05 | No  |
| 1-stearoyl-GPE (18:0)                              | Lyso-PE        | 0,09<br>7 | 0,03<br>1 | 2,16E-<br>06 | No  |
| 1-palmitoyl-GPE (16:0)                             | Lyso-PE        | 0,09<br>0 | 0,02<br>9 | 9,97E-<br>06 | No  |
| 1-oleoyl-GPE (18:1)                                | Lyso-PE        | 0,08<br>7 | 0,03<br>0 | 2,03E-<br>05 | Yes |
| 1-stearoyl-2-arachidonoyl-GPI (18:0/20:4)          | PI             | 0,10<br>9 | 0,03<br>0 | 9,89E-<br>08 | No  |
| 1-palmitoyl-2-arachidonoyl-GPI (16:0/20:4)         | PI             | 0,10<br>2 | 0,02<br>9 | 7,17E-<br>07 | Yes |
| 1-stearoyl-2-docosapentaenoyl-GPC (18:0/22:5n3)    | PC             | 0,09<br>6 | 0,03<br>1 | 2,69E-<br>06 | Yes |
| 1-stearoyl-2-dihomolinolenoyl-GPC (18:0/20:3n3or6) | PC             | 0,09<br>2 | 0,02<br>6 | 6,61E-<br>06 | Yes |
| 1-myristoyl-2-arachidonoyl-GPC (14:0/20:4)         | PC             | 0,09<br>0 | 0,02<br>8 | 1,08E-<br>05 | No  |
| 1-myristoyl-2-docosahexaenoyl-GPC (14:0/22:6)      | PC             | 0,08<br>9 | 0,02<br>8 | 1,33E-<br>05 | Yes |
| phosphatidylcholine (16:0/22:5n3; 18:1/20:4)       | PC             | 0,08<br>6 | 0,03<br>1 | 2,33E-<br>05 | Yes |
| 1-stearoyl-2-docosapentaenoyl-GPC (18:0/22:5n6)    | PC             | 0,08<br>5 | 0,02<br>7 | 3,19E-<br>05 | Yes |
| 2-myristoyl-GPC (14:0)                             | Lyso-PC        | 0,08<br>7 | 0,02<br>9 | 2,55E-<br>05 | Yes |
| 1-myristoyl-GPC (14:0)                             | Lyso-PC        | 0,08<br>4 | 0,02<br>9 | 3,81E-<br>05 | Yes |
| 1-stearoyl-GPG (18:0)                              | Lyso-PG        | 0,09<br>9 | 0,03<br>1 | 1,04E-<br>05 | Yes |

|                                                   |                                |                |           |              |     |
|---------------------------------------------------|--------------------------------|----------------|-----------|--------------|-----|
| <b>Fatty acyls</b>                                |                                |                |           |              |     |
| 3-methyl-2-oxovalerate                            | Fatty acid ester               | 0,09<br>1      | 0,02<br>8 | 7,52E-<br>06 | Yes |
| <b>Other metabolites</b>                          |                                |                |           |              |     |
| Mannonate                                         | -                              | -<br>0,23<br>2 | 0,03<br>0 | 0,00E+<br>00 | Yes |
| Alpha-ketobutyrate                                | Keto acids                     | 0,09<br>9      | 0,02<br>8 | 1,14E-<br>06 | Yes |
| Hydroxy-palmitoyl-sphingomyelin (d18:1/16:0 (OH)) | -                              | -<br>0,08<br>8 | 0,03<br>1 | 1,65E-<br>05 | Yes |
| 2-hydroxybutyrate/2-hydroxyisobutyrate            | α-hydroxy acid                 | 0,08<br>6      | 0,02<br>8 | 2,58E-<br>05 | Yes |
| Glutamine conjugate of C6H10O21                   | -                              | -<br>0,08<br>6 | 0,02<br>7 | 2,98E-<br>05 | Yes |
| Glutamine conjugate of C7H12O2                    | -                              | -<br>0,08<br>8 | 0,02<br>8 | 3,55E-<br>05 | Yes |
|                                                   |                                |                |           |              |     |
| <b>PPP1R3B</b>                                    |                                |                |           |              |     |
| <b>Amino acids</b>                                |                                |                |           |              |     |
| Glycine*                                          | -                              | 0,13<br>8      | 0,03<br>5 | 1,34E-<br>11 | No  |
| Hexanoylglutamine*                                | -                              | -<br>0,10<br>5 | 0,03<br>7 | 3,07E-<br>07 | Yes |
| N-acetylkynurenine [2]                            | N-acyl-L-α-amino acids         | -<br>0,09<br>8 | 0,03<br>9 | 2,38E-<br>06 | Yes |
| <b>Lipids</b>                                     |                                |                |           |              |     |
| <b>Glycerophospholipids</b>                       |                                |                |           |              |     |
| 1-palmitoyl-GPE (16:0)                            | Lyso-PE                        | 0,08<br>7      | 0,03<br>8 | 1,89E-<br>05 | Yes |
| 2-palmitoyl-GPE (16:0)                            | Lyso-PE                        | 0,08<br>5      | 0,04<br>0 | 3,43E-<br>05 | Yes |
| <b>Steroids</b>                                   |                                |                |           |              |     |
| Androstenediol-3-alpha-17-alpha-monosulfate [3]   | Sulfated steroids              | 0,09<br>6      | 0,04<br>0 | 2,53E-<br>06 | Yes |
| Pregnenediol disulfate (C21H34O8S2)               | Sulfated steroids              | 0,09<br>2      | 0,04<br>0 | 6,72E-<br>06 | Yes |
| Pregnenetriol disulfate                           | Sulfated steroids              | 0,08<br>9      | 0,03<br>9 | 1,33E-<br>05 | Yes |
| Etiocholanolone glucuronide                       | Steroid glucuronide conjugates | 0,09<br>3      | 0,04<br>1 | 6,49E-<br>06 | Yes |
| <b>Other metabolites</b>                          |                                |                |           |              |     |



|                                        |                                  |                |           |              |     |
|----------------------------------------|----------------------------------|----------------|-----------|--------------|-----|
| Xanthurenate                           | Quinoline<br>carboxylic<br>acids | -<br>0,08<br>5 | 0,03<br>8 | 3,64E-<br>05 | Yes |
|                                        |                                  |                |           |              |     |
| <b>HSD17B13</b>                        |                                  |                |           |              |     |
| <b>Lipids</b>                          |                                  |                |           |              |     |
| <b>Glycerophospholipids</b>            |                                  |                |           |              |     |
| 1-stearoyl-2-linoleoyl-GPE (18:0/18:2) | PE                               | 0,08<br>5      | 0,03<br>6 | 3,37E-<br>05 | Yes |
| 1-stearoyl-2-oleoyl-GPE (18:0/18:1)    | PE                               | 0,08<br>5      | 0,03<br>6 | 3,49E-<br>05 | Yes |

Abbreviations: Lyso-PC, lysophosphatidylcholine; lyso-PE, lyso-phosphatidylethanolamine; lyso-PG, lyso-phosphatidylglycerol; lyso-PI, lyso-phosphatidylinositol; PC, phosphatidylcholine; PE, phosphatidylethanolamine; PI, phosphatidylinositol;

\*No statistically significant differences in the betas from linear regression analysis between the carriers of the same genetic variants with and without NAFLD.
